# Supplementary material
Source: Research Square preprint supplement (doi:10.21203/rs.3.rs-8920766/v1)

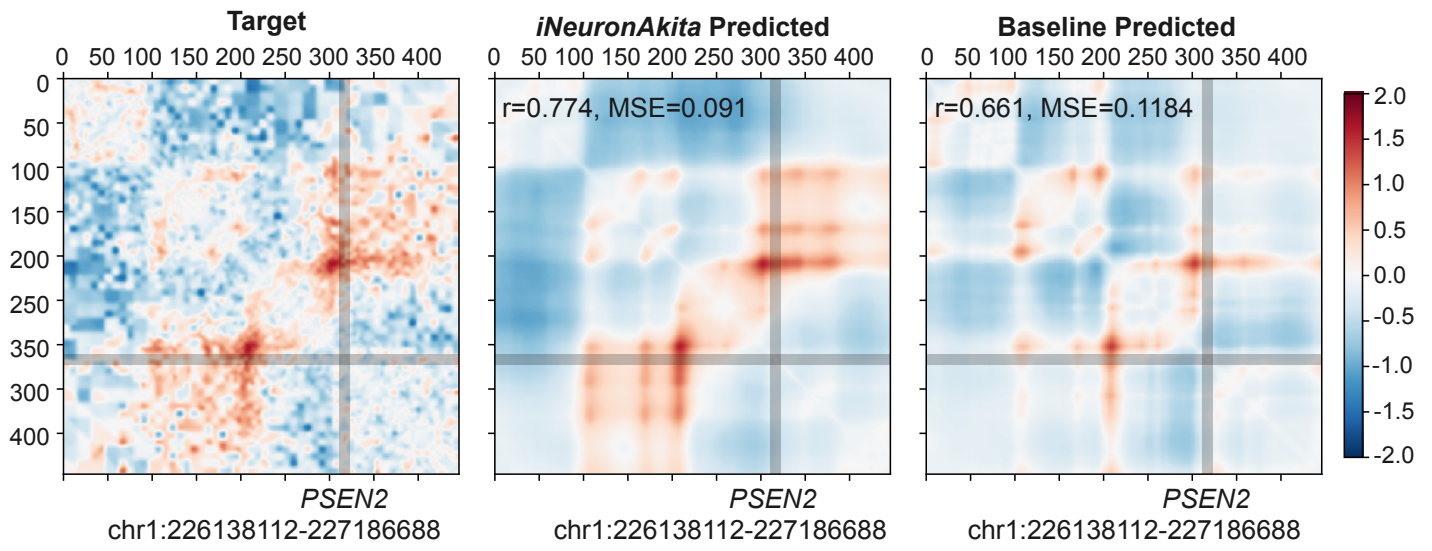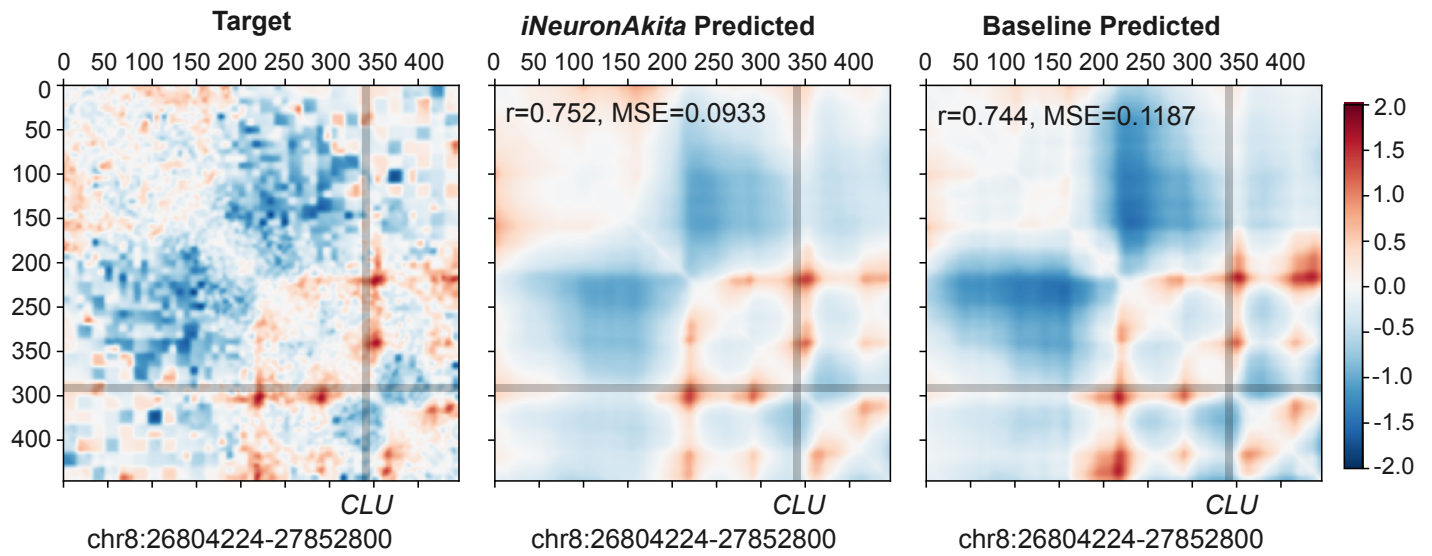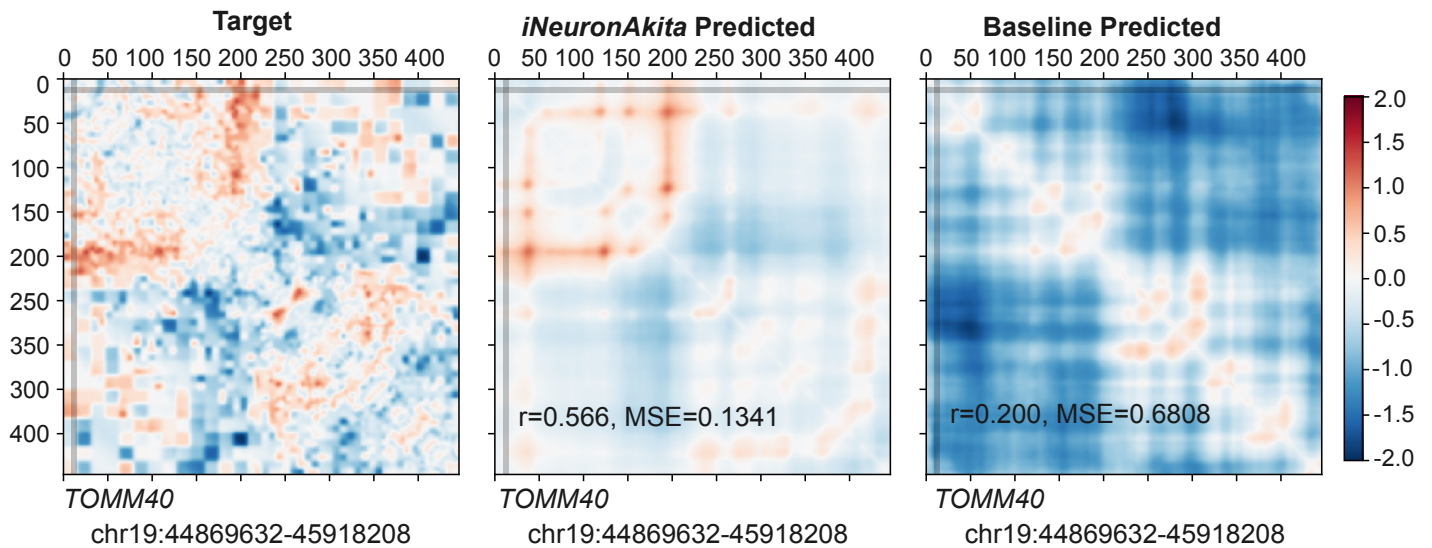

Supplement: Supplementary file 1 [file a877f16af475e26f2ec9beb7.pdf]
